# Supplementary material for: Prohibitin Links Cell Cycle, Motility and Invasion in Prostate Cancer Cells
Source: MDPI journal article supplement (doi:10.3390/ijms24129919), 2023-06-08
Supplement: s1 [file s1]

A.

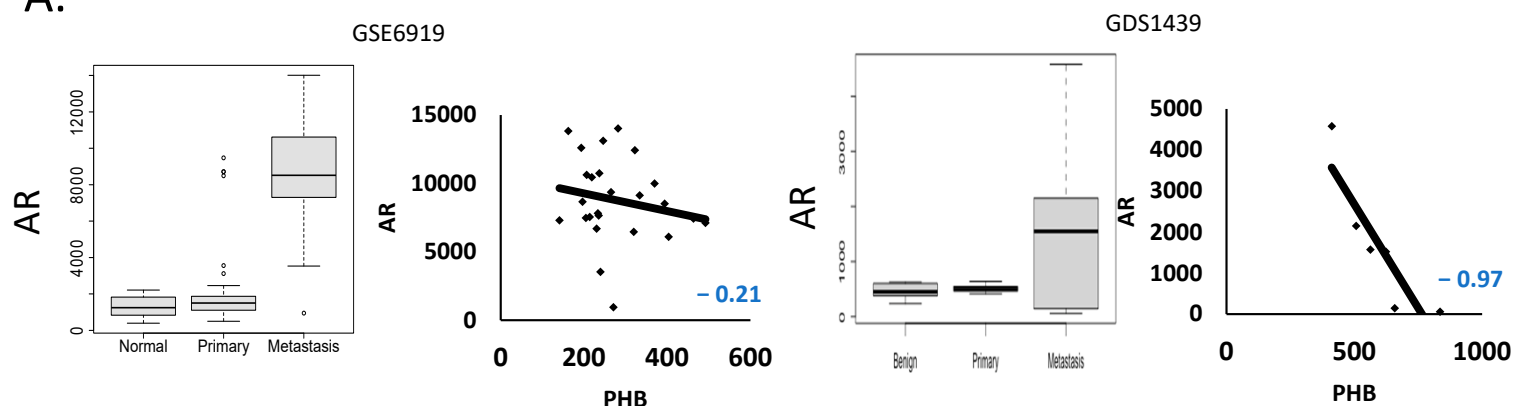

B.

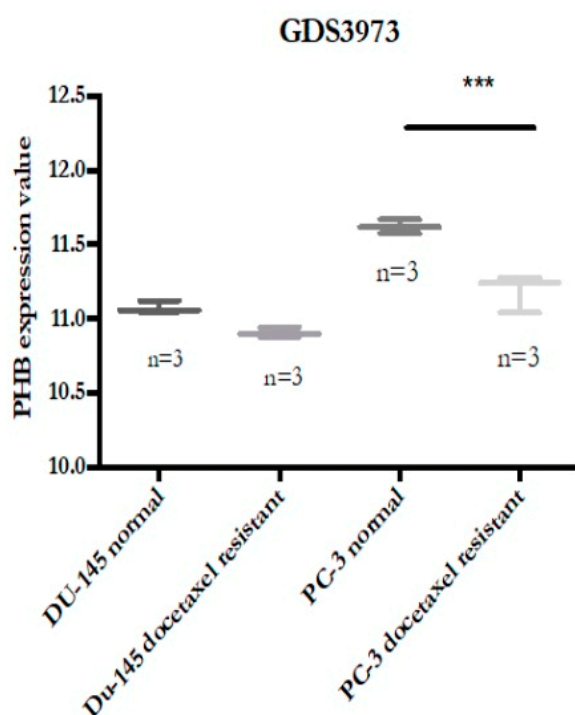

C.

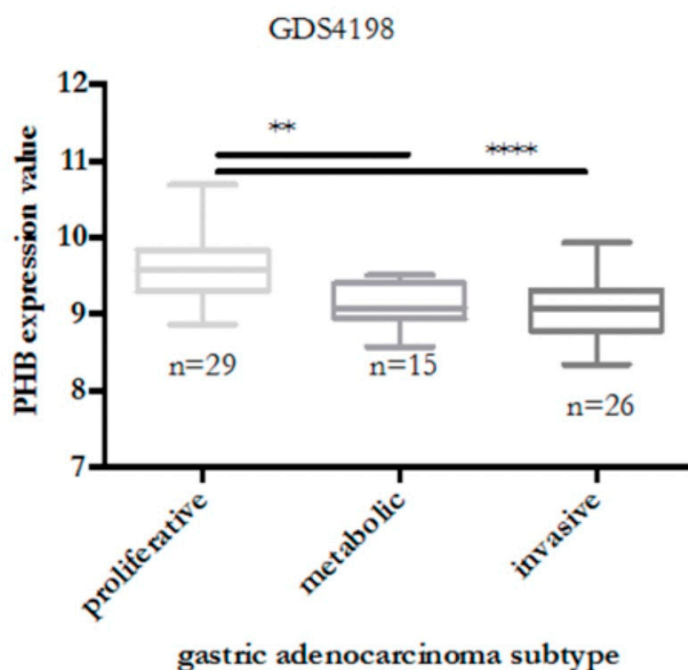

## Supplemental Figure S1.

**A**, Boxplots showing AR expression values from the GSE6919 and GDS1439 datasets. Data is separated into normal prostate tissue (n=17), primary prostate cancer (n=66) and metastatic prostate cancer (n=25). Graph on left hand side shows the regression analysis of AR versus PHB expression. **B**, Boxplots showing the PHB expression values from GDS3973 (docetaxel-resistant prostate cancer cell lines). **C**, Boxplots showing PHB expression from the GDS4198 dataset (gastric adenocarcinoma). \*\*  $p \leq 0.01$ , \*\*\*  $p \leq 0.001$ , \*\*\*\*  $p \leq 0.0001$ .

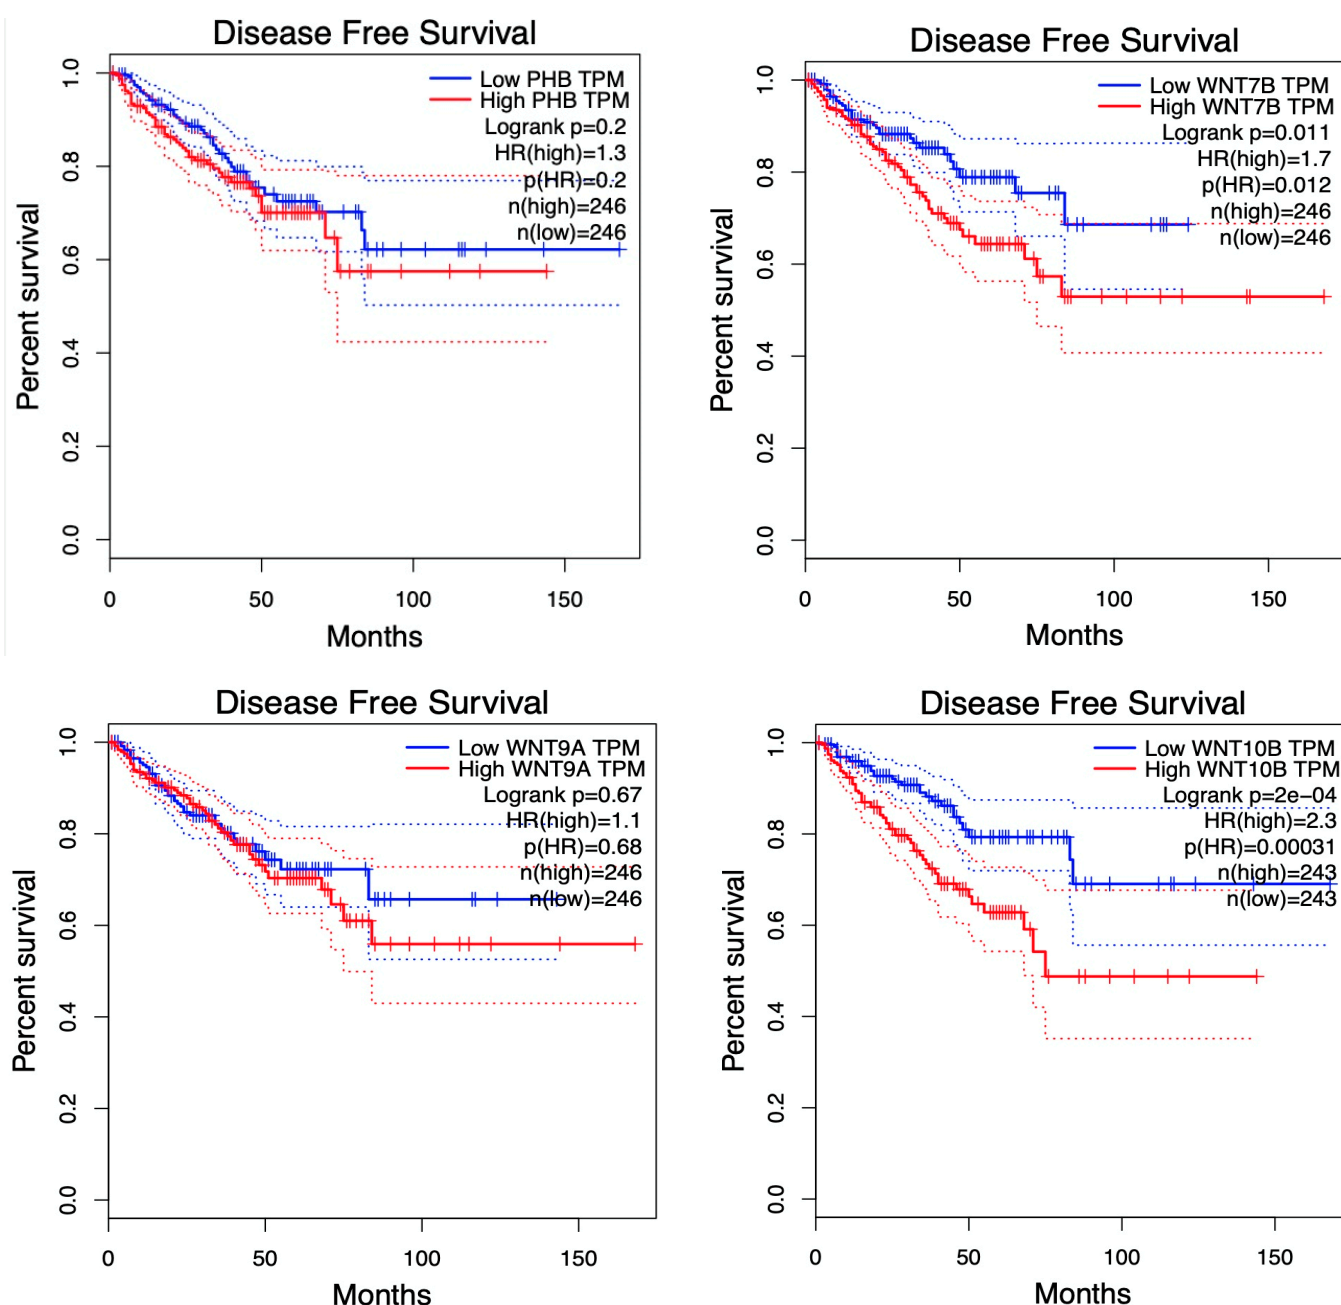

## Supplemental Figure S2.

Kaplan-meier disease free survival plots for PHB, WNT7B, 9A and 10B. Dotted lines represent the 95% confidence interval. Red is high expression, blue is low expression. Data from Gepia [Tang, Z. et al. \(2017\)](https://doi.org/10.1093/nar/gkx247) GEPIA: a web server for cancer and normal gene expression profiling and interactive analyses. Nucleic Acids Res, 10.1093/nar/gkx247.

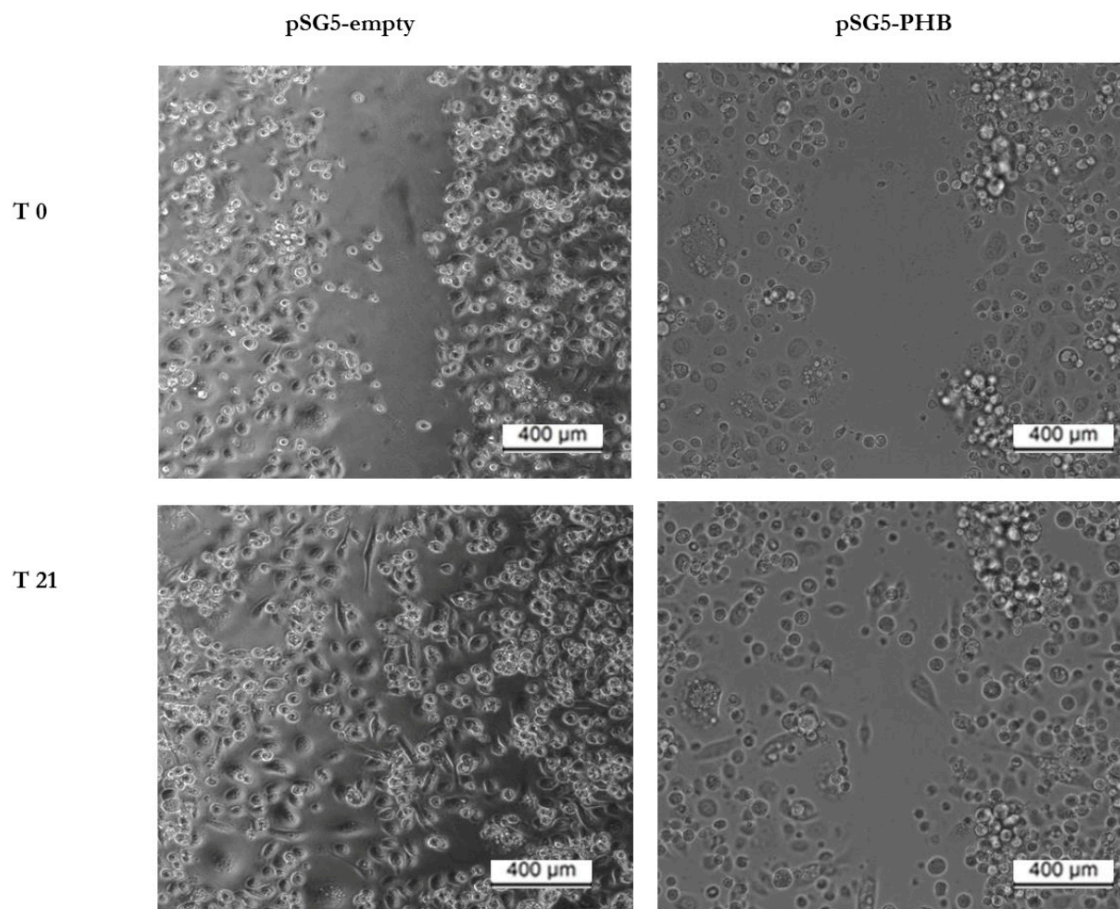

### Supplemental Figure S3.

Wound healing assay using PC3 cells, either transfected with empty or pSG5-PHB expression vector over 21 hours.

## KLK2

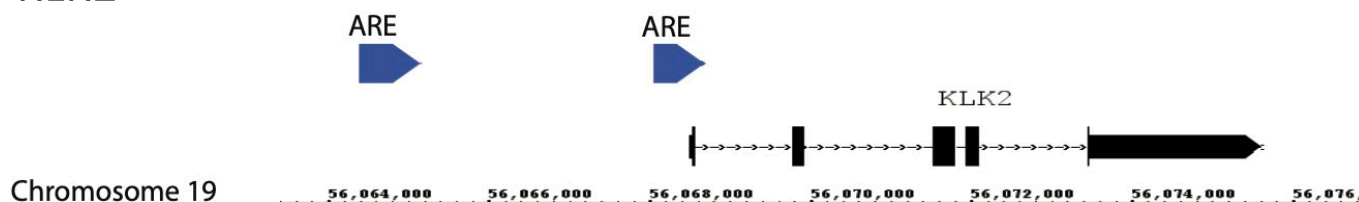

## WNT7B

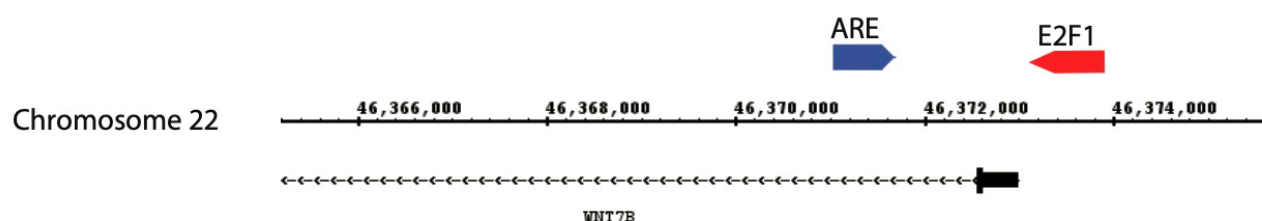

## WNT10B

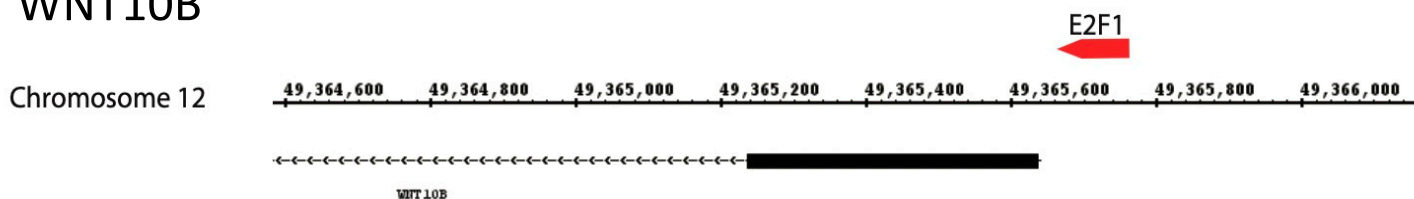

## WNT9A

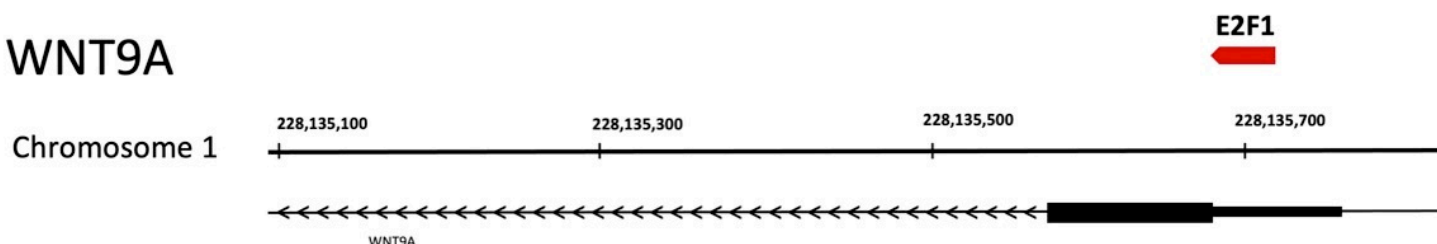

## Supplemental Figure S4.

Analysis of E2F1 & AR binding sites in the WNT7B, 9A and 10B genes, including promoter regions. The androgen-regulated KLK2 gene is given for comparison. Data taken from genome browser (<https://genome.ucsc.edu/>), GSE28219 and Alggen (<https://Alggen.lsi.upc>).

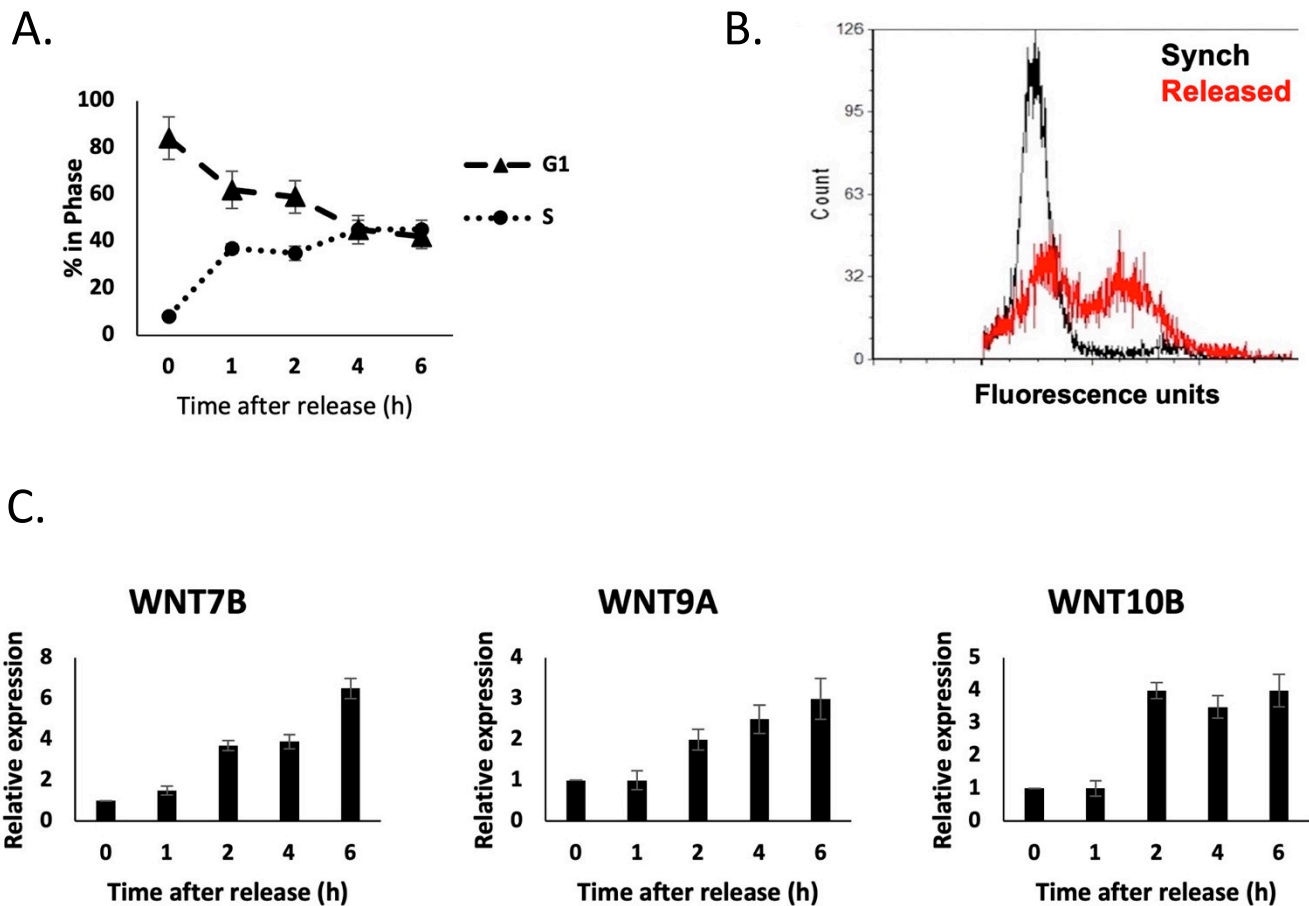

## Supplemental Figure S5.

**A**, G1 and S phase % of HeLa cells either synchronised in a thymidine/aphidicolin block and then released into normal media for 0-6 hours. **B**, Cell cycle distribution of HeLa cells either synchronised with thymidine/aphidicolin and then released into normal media for 6 hours. **C**, Q-PCR analysis of WNT7B, 9A and 10B from HeLa cells released from thymidine/aphidicolin block. Normalised to *GAPDH*, *RPL19* and  $\beta$ -actin expression.
